# Supplementary material
Source: ML conference proceedings conference paper supplement (https://openaccess.thecvf.com/content/ICCV_2017/html/Vo_Revisiting_IM2GPS_in_ICCV_2017_paper.html)
Supplement: Supplementary file 1 [file Vo_Revisiting_IM2GPS_in_ICCV_2017_supplemental.pdf]

## Supplemental Material

### 1. Implementation

Here we will provide some more detail about our implementation. We use Caffe framework [14]. We use learning rate 0.01 and reduce it several time during the training, to 0.00001 (when the loss seems to stop improving). Mini-batch size is 32, momentum is 0.9 and weight decay factor is 0.0005.

We use VGG trained on ImageNet [29] as initialization and train a network with the 1060 ways classification for 500k iterations. Then we use this network as initialization for training every other networks (usually just another 100k-200k iterations), we found that this speed up the experiment quite a lot since training every model from scratch or ImageNet initialization take much more time. As shown in Table 3, the pretrained ImageNet model ([I]) can be also be used for retrieval, but not as effective as a model trained for geolocalization task ([L]).

When training with multiple losses, the overall loss will be the weighted sum of all the losses. For [M] model, we use the same weight (1) for all 6 losses.

### 2. Feature visualization

We show a t-SNE visualization in Figure 9. The feature learnt from GPS supervision seems to be very high level; there's many regions in this visualization with consistent theme such as: sport scene images, people images, beach and sunset images, animal images, landmark type of architecture images, etc. There's a large variety in image appearance within a region.

In Figure 10 we look at some dimensions in the output feature space and show the images whose has a high corresponding feature value. Few activation outputs do correspond to some particularly popular landmarks/architecture; while many correspond to certain type of scene or visual features. Some seems to respond to more than one visual features and some might roughly represent higher level location-based semantics. For example row 5 shows pictures of Disney-like castle and Disney's Mickey mouse even-though they are not visually similar.

We show some more nearest neighbors example result in Figure 11.

Table 3. Performance on Im2GPS3k test set.

| Method           | Model | Stre. | City | Reg. | Cou. | Cont. |
|------------------|-------|-------|------|------|------|-------|
| NN               | [I]   | 7.4   | 17.0 | 19.6 | 26.8 | 41.9  |
|                  | [L]   | 7.5   | 18.9 | 23.5 | 32.6 | 49.5  |
| kNN, $\sigma=1$  | [I]   | 7.5   | 18.3 | 22.5 | 30.2 | 45.8  |
|                  | [L]   | 7.8   | 20.9 | 27.1 | 36.8 | 53.8  |
| kNN, $\sigma=4$  | [I]   | 7.0   | 16.8 | 22.1 | 31.9 | 48.7  |
|                  | [L]   | 7.2   | 19.4 | 26.9 | 38.9 | 55.9  |
| kNN, $\sigma=16$ | [I]   | 4.4   | 10.6 | 15.4 | 32.2 | 51.2  |
|                  | [L]   | 5.3   | 13.8 | 21.2 | 39.9 | 58.9  |

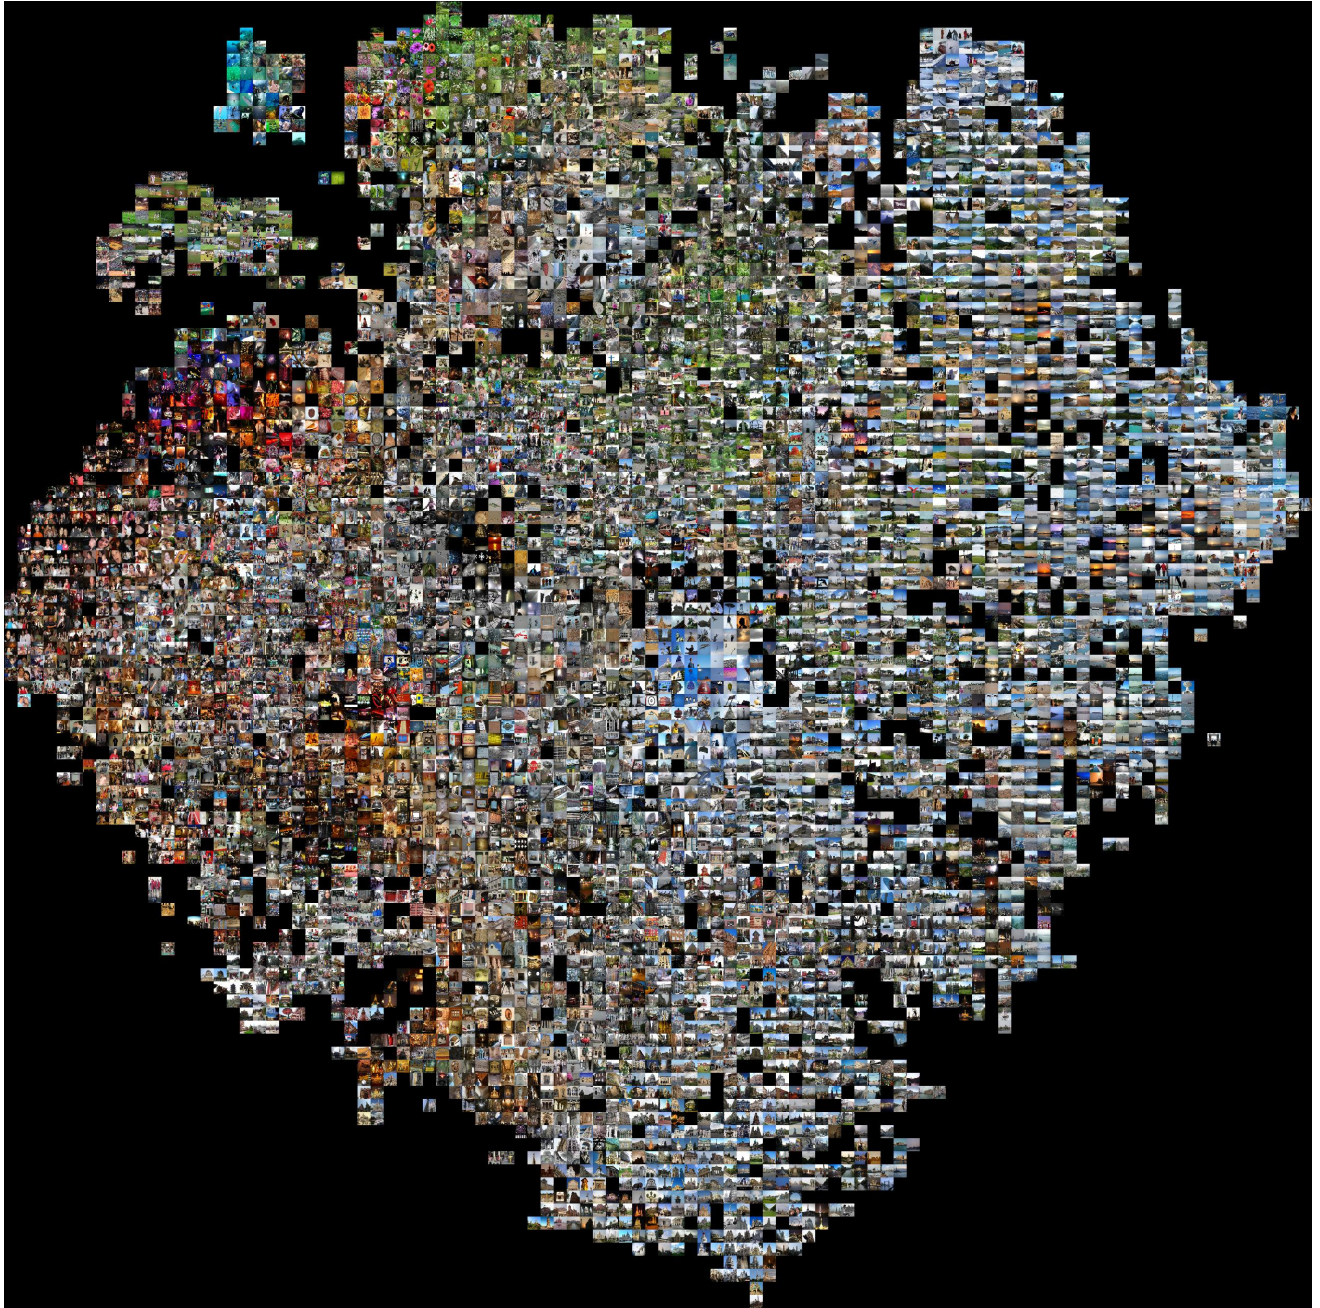

Figure 9. t-SNE visualization



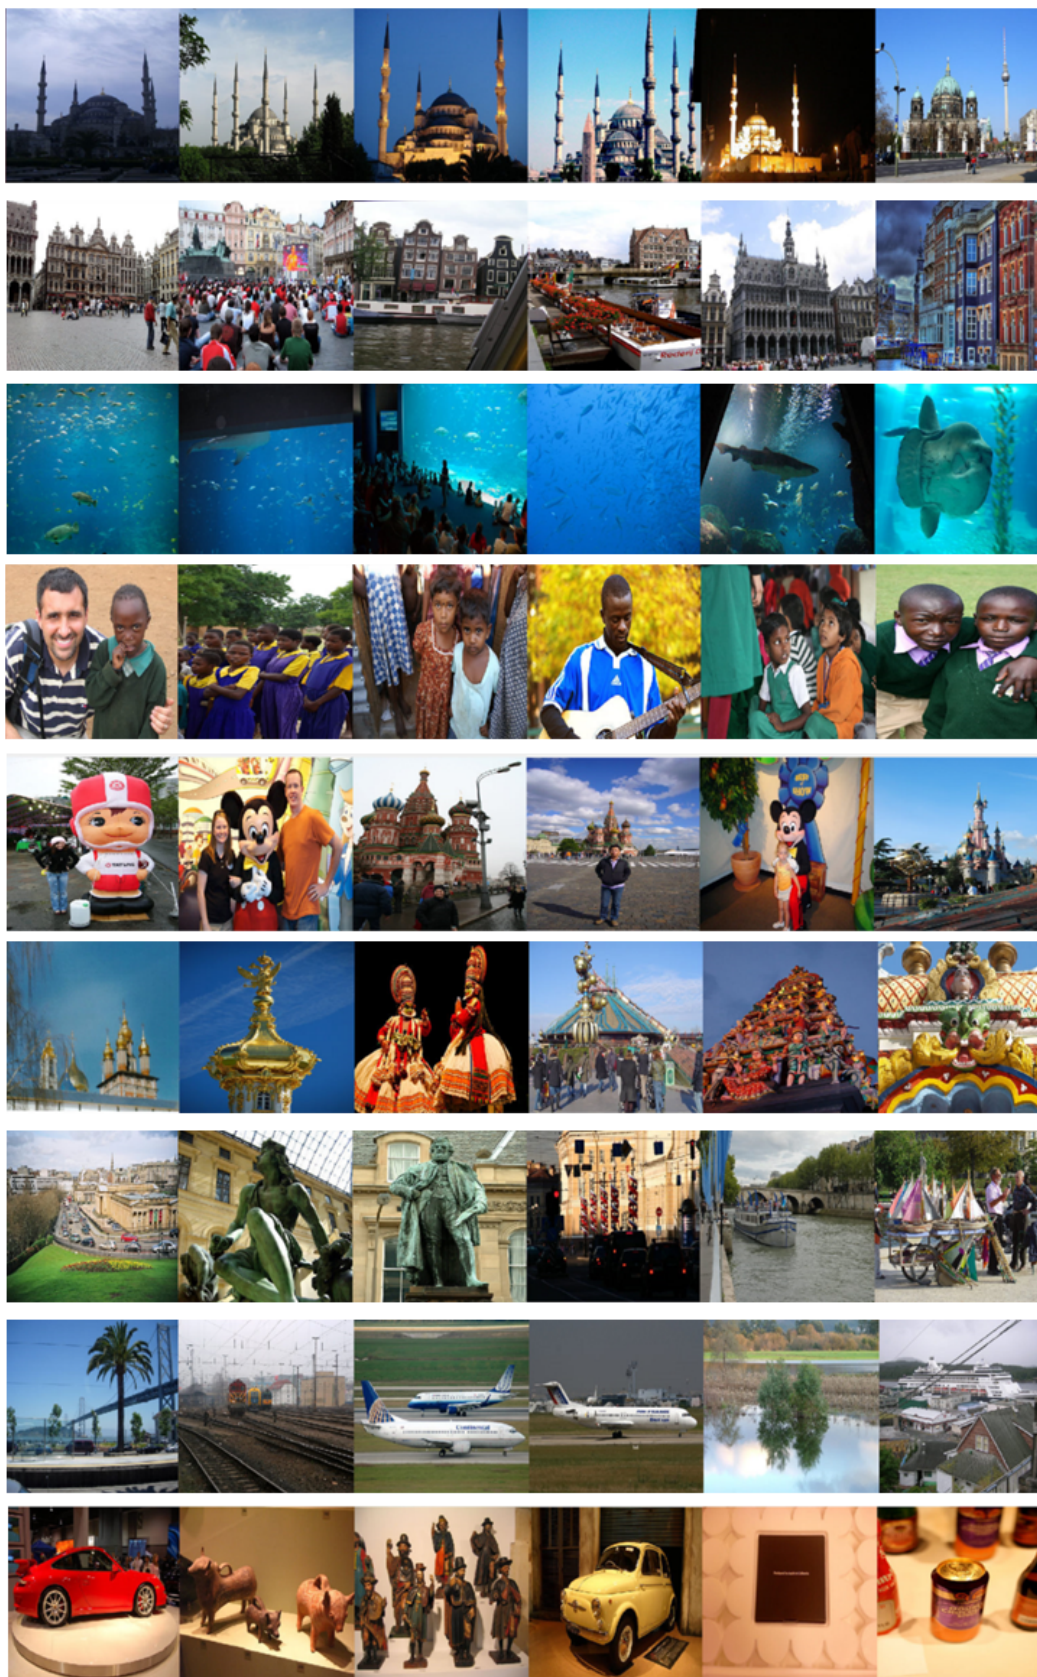

Figure 10. Each row shows a set of images whose feature has a high value at a particular activation unit (last layer).



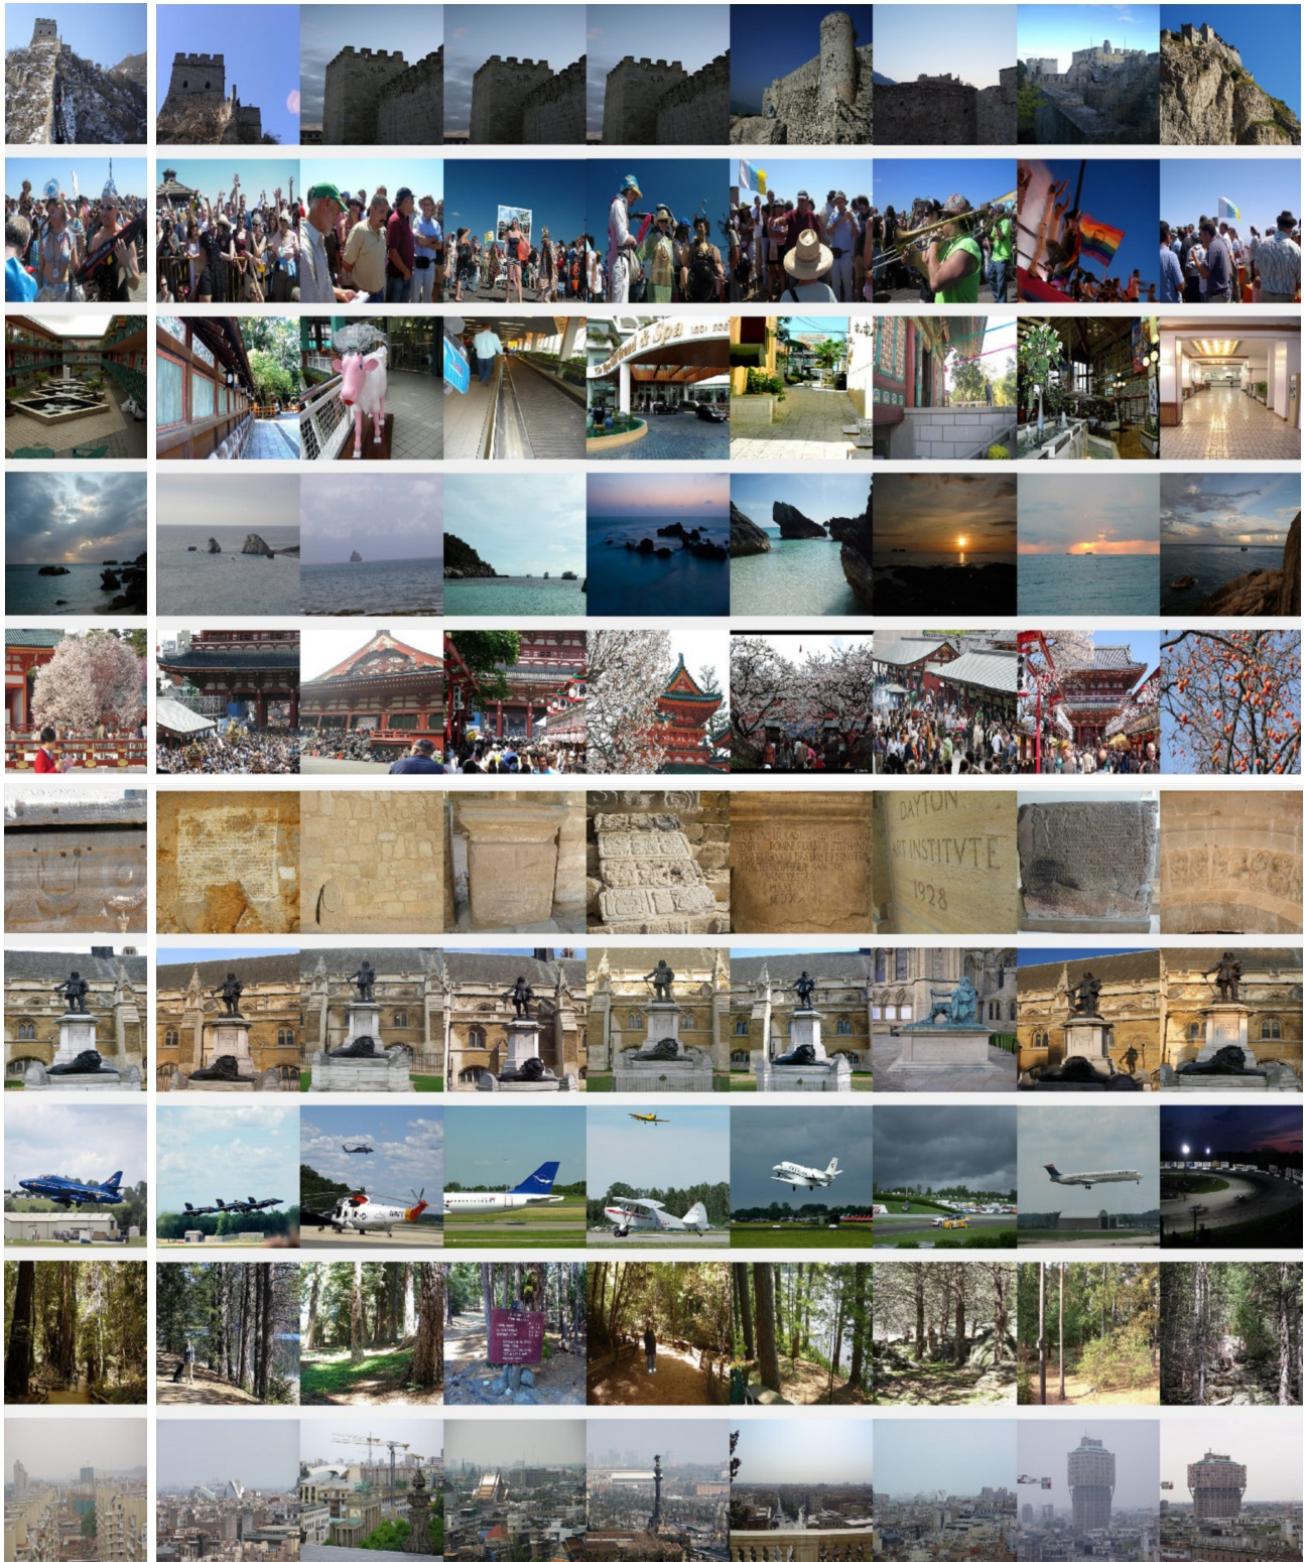

Figure 11. Some qualitative near neighbors result: the images on the left column are query, the other on the same row are its NNs.
